# Supplementary material for: Phase behavior and interfacial tension of ternary polymer mixtures with block copolymers
Source: Royal Society of Chemistry journal article supplement (doi:10.1039/d1ra07671j), 2021-01-01
Supplement: d1ra07671j1.pdf [file d1ra07671j1.pdf]

ARTICLE

## Phase Behavior and Interfacial Tension of polymer mixtures with block copolymers

Dongmei Liu,<sup>a</sup> Ye Lin,<sup>a</sup> Kai Gong,<sup>a</sup> Huifeng Bo,<sup>\*a</sup> Deyang Li,<sup>a</sup> Zhanxin Zhang,<sup>a</sup> and Wenduo Chen,<sup>\*b</sup>

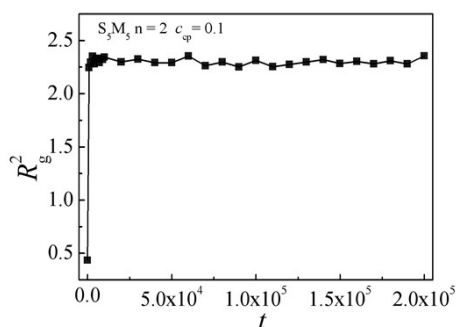

**Fig.S1**  $R_g^2$  of the copolymers  $S_5M_5$  for the case  $S_2/S_5M_5/M_2$  with  $c_{cp} = 0.1$  as a function of the simulation time

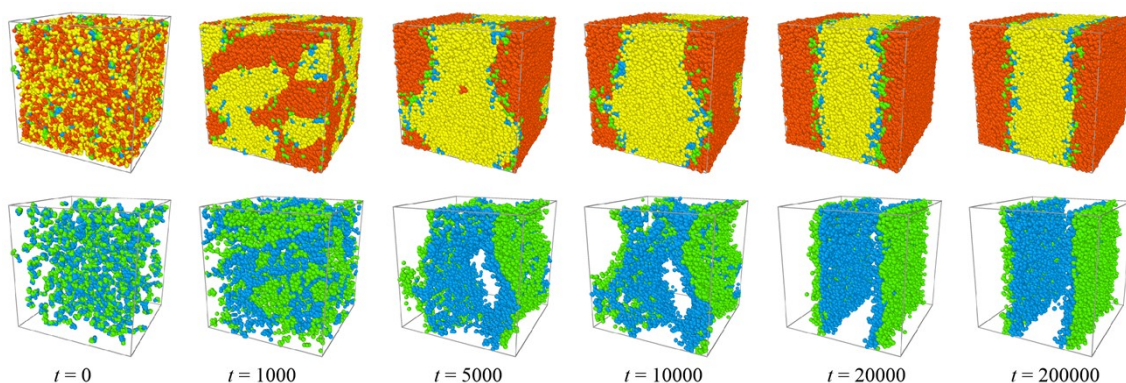

**Fig.S2** Representative morphology snapshots for  $S_2/S_5M_5/M_2$  mixtures at different simulation times with  $c_{cp} = 0.1$ . Red and yellow spheres represent bead S and bead M of homopolymers, and green and blue spheres represent beads S and M of the copolymers

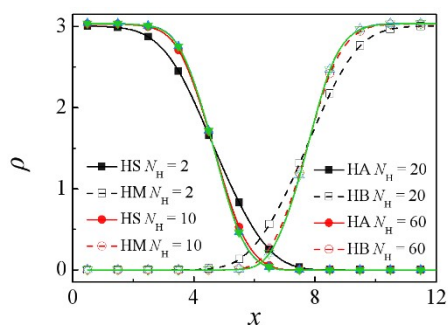

**Fig.S3** Density profiles of homopolymer beads along the x-direction as a function of homopolymer chain length  $N_H$  in mixture systems of  $S_5M_5$

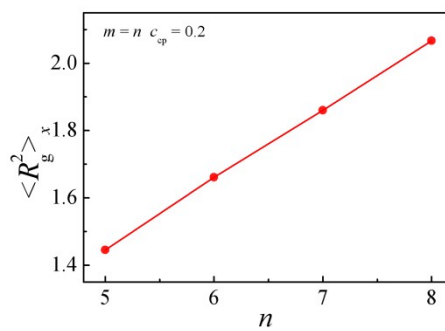

Fig.S4 The x component of the mean-squared radius of gyration as a function of  $n$  ( $m = n = 5, 6, 7, 8$ )
